# Supplementary material for: Source backtracking for dust storm emission inversion using an adjoint method: case study of Northeast China
Source: Copernicus journal article supplement (doi:10.5194/acp-20-15207-2020), 2020-12-08
Supplement: Supplementary file 1 [file acp-20-15207-2020-supplement.pdf]

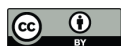

*Supplement of*

## **Source backtracking for dust storm emission inversion using an adjoint method: case study of Northeast China**

**Jianbing Jin et al.**

*Correspondence to:* Jianbing Jin ([jianbing.jin@nuist.edu.cn](mailto:jianbing.jin@nuist.edu.cn)) and Hong Liao ([hongliao@nuist.edu.cn](mailto:hongliao@nuist.edu.cn))

The copyright of individual parts of the supplement might differ from the CC BY 4.0 License.

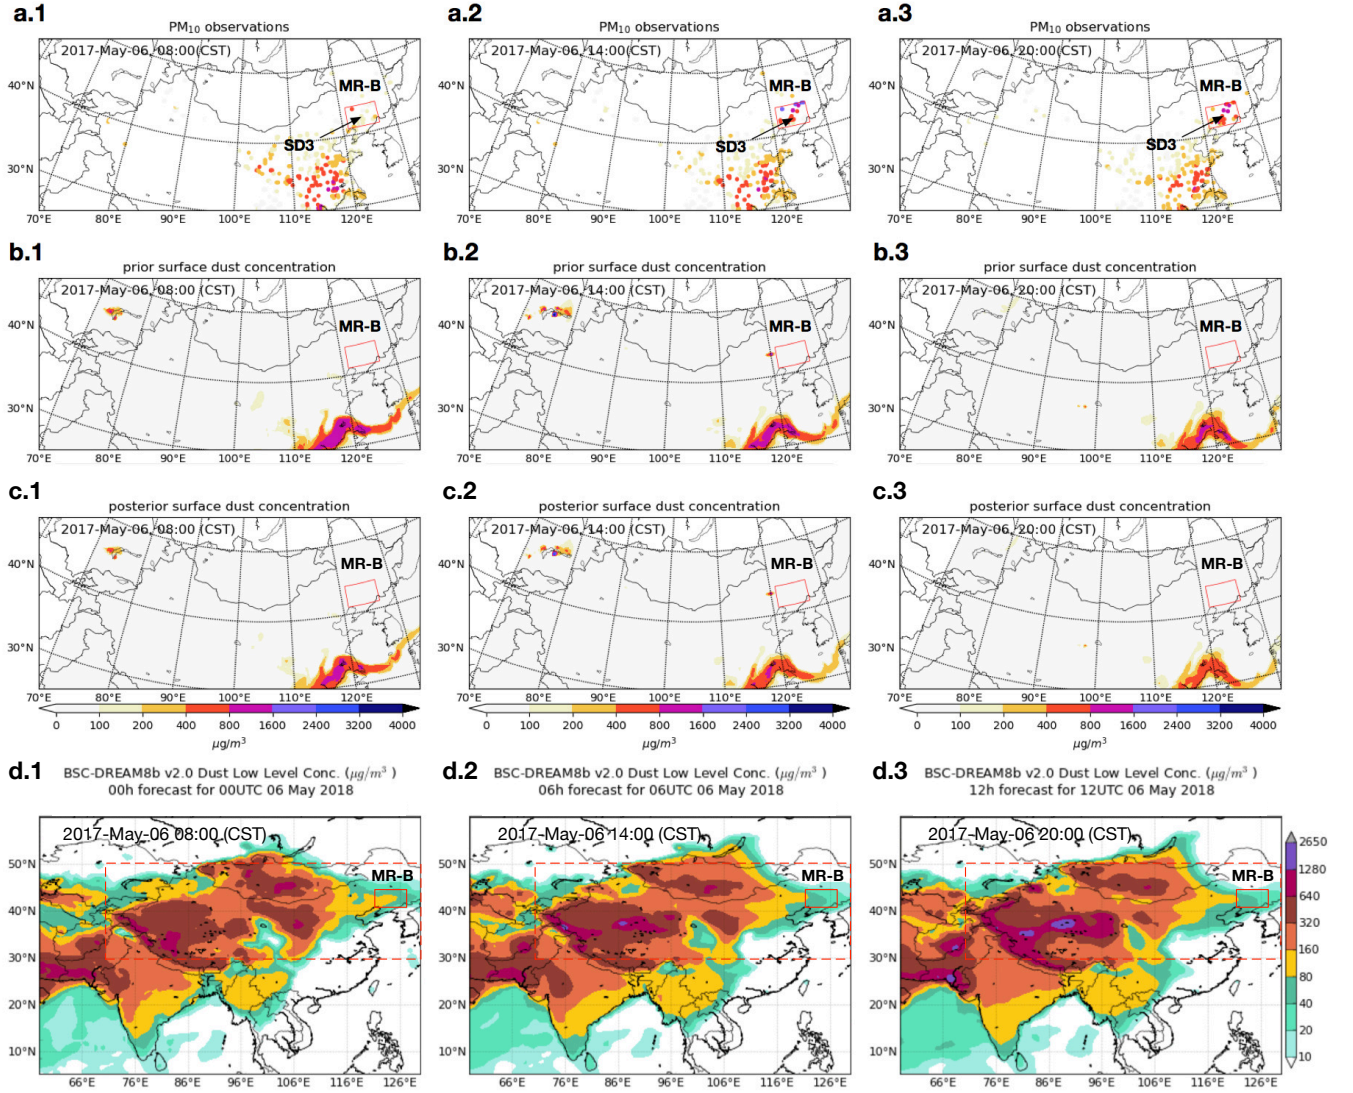

**Figure S1.** PM<sub>10</sub> observations (a.1~a.3) vs. surface dust concentration simulation of the 3rd severe dust (SD3) from Lotos-Euros prior (b.1~b.3), posterior (c.1~c.3) and BSC-DREAM8b (d.1~d.3) over the marked region B (MR-B) at May 06 08:00 (CST): a.1~d.1; 14:00 (CST): a.2~d.2; 20:00 (CST): a.3~d.3.

### Sensitivities to dust simulation at MR2\_14 2017-05-06 19:00 CST

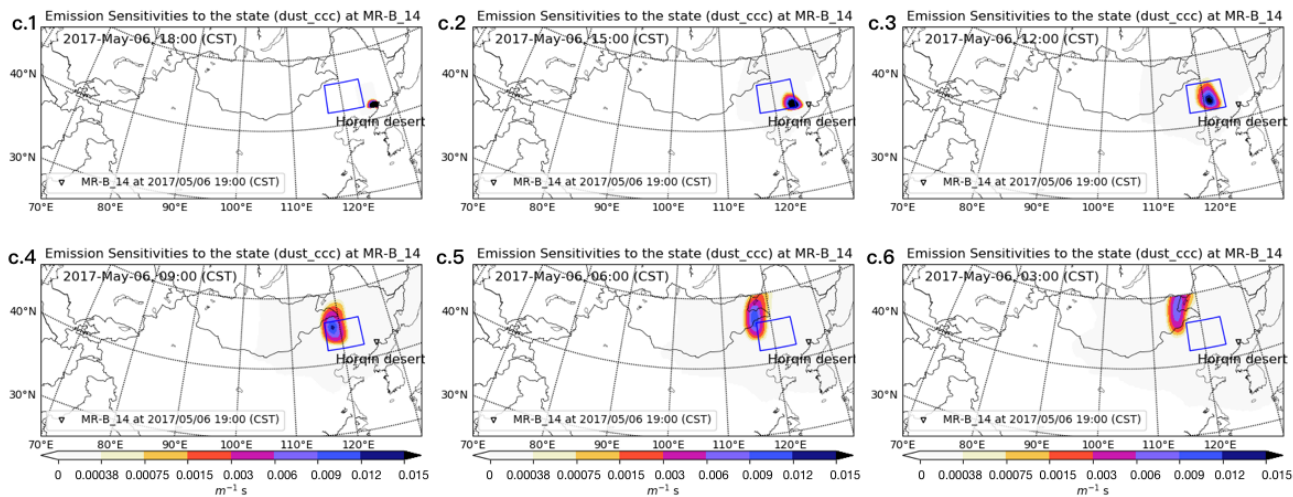

**Figure S2.** Backward time series of emission sensitivity of the dust simulation at MR-B\_14 2017 May 06, 19:00 CST: emission sensitivity distribution at 2017 May 06, 18:00 (c.1), 15:00 (c.2), 12:00 (c.3), 09:00 (c.4), 06:00 (c.5), 03:00 (c.6).

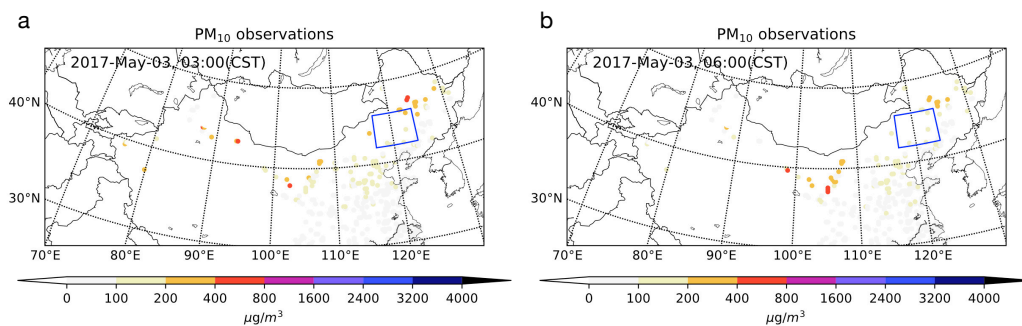

**Figure S3.** PM<sub>10</sub> observations at May 03 03:00 CST (a), May 03 06:00 (b).
